# Supplementary material
Source: PubMed Central journal article supplement (PMC2265457)
Supplement: blood_blood-2007-10-119099_1.pdf [file blood_blood-2007-10-119099_1.pdf]

|    | Gene Set Category | Pathway                                             | Set Size | %Up | Ntk Stat | Ntk q-value | Ntk Rank | NEK* Stat | NEK* q-value | NEK* Rank |
|----|-------------------|-----------------------------------------------------|----------|-----|----------|-------------|----------|-----------|--------------|-----------|
| 1  | KEGG:04512        | ECM-receptor interaction                            | 47       | 19  | -6.19    | <0.0001     | 3        | -3.86     | <0.0001      | 1         |
| 2  | GO:0005604        | basement membrane                                   | 23       | 9   | -5.49    | <0.0001     | 5        | -3.71     | <0.0001      | 2         |
| 3  | KEGG:04510        | Focal adhesion                                      | 135      | 30  | -5.34    | <0.0001     | 6        | -3.37     | <0.0001      | 8         |
| 4  | GO:0005201        | extracellular matrix structural constituent         | 40       | 18  | -7.63    | <0.0001     | 1        | -3.04     | <0.0001      | 20        |
| 5  | GO:0004857        | enzyme inhibitor activity                           | 128      | 28  | -3.37    | <0.0001     | 19       | -3.61     | <0.0001      | 3         |
| 6  | KEGG:01430        | Cell Communication                                  | 53       | 23  | -5.05    | <0.0001     | 7        | -2.95     | <0.0001      | 24        |
| 7  | GO:0016126        | sterol biosynthesis                                 | 22       | 27  | -3.86    | <0.0001     | 11       | -2.76     | <0.0001      | 31        |
| 8  | GO:0005605        | basal lamina                                        | 14       | 7   | -4.06    | <0.0001     | 10       | -2.6      | <0.0001      | 38        |
| 9  | GO:0007265        | Ras protein signal transduction                     | 29       | 34  | -3.01    | <0.0001     | 33       | -3.1      | <0.0001      | 15        |
| 10 | GO:0001817        | regulation of cytokine production                   | 16       | 50  | 2.93     | <0.0001     | 39       | 3.14      | <0.0001      | 13        |
| 11 | GO:0042035        | regulation of cytokine biosynthesis                 | 16       | 50  | 2.93     | <0.0001     | 39       | 3.14      | <0.0001      | 13        |
| 12 | GO:0009064        | glutamine family amino acid metabolism              | 23       | 65  | 2.85     | <0.0001     | 48       | 3.16      | <0.0001      | 12        |
| 13 | KEGG:00220        | Urea cycle and metabolism of amino groups           | 18       | 72  | 2.89     | <0.0001     | 44       | 3.05      | <0.0001      | 17        |
| 14 | KEGG:00330        | Arginine and proline metabolism                     | 38       | 66  | 2.86     | <0.0001     | 46       | 3.08      | <0.0001      | 16        |
| 15 | GO:0007588        | Excretion                                           | 16       | 63  | 3.3      | <0.0001     | 22       | 2.5       | <0.0001      | 44        |
| 16 | GO:0050954        | sensory perception of mechanical stimulus           | 39       | 31  | -2.45    | <0.0001     | 74       | -3.45     | <0.0001      | 7         |
| 17 | GO:0007605        | sensory perception of sound                         | 39       | 31  | -2.45    | <0.0001     | 74       | -3.45     | <0.0001      | 7         |
| 18 | GO:0042089        | cytokine biosynthesis                               | 17       | 47  | 2.57     | <0.0001     | 62       | 2.97      | <0.0001      | 22        |
| 19 | GO:0043062        | extracellular structure organization and biogenesis | 11       | 9   | -4.67    | <0.0001     | 8        | -2.33     | 0.2305       | 81        |
| 20 | GO:0030198        | extracellular matrix organization and biogenesis    | 11       | 9   | -4.67    | <0.0001     | 8        | -2.33     | 0.2305       | 81        |
| 21 | GO:0007059        | chromosome segregation                              | 25       | 12  | -4.51    | <0.0001     | 9        | -2.33     | 0.2305       | 81        |
| 22 | GO:0006937        | regulation of muscle contraction                    | 17       | 24  | -3.62    | <0.0001     | 14       | -2.33     | 0.2305       | 81        |
| 23 | KEGG:04060        | Cytokine-cytokine receptor interaction              | 79       | 30  | -3.34    | <0.0001     | 21       | -2.33     | 0.2305       | 81        |
| 24 | GO:0005578        | extracellular matrix (sensu Metazoa)                | 102      | 21  | -6.55    | <0.0001     | 2        | -2.32     | 0.2267       | 105       |
| 25 | GO:0031012        | extracellular matrix                                | 102      | 21  | -6.55    | <0.0001     | 2        | -2.32     | 0.2286       | 105       |
| 26 | GO:0005581        | Collagen                                            | 15       | 13  | -5.69    | <0.0001     | 4        | -2.21     | 0.2211       | 108       |
| 27 | GO:0043161        | proteasomal ubiquitin-dependent protein catabolism  | 11       | 18  | -2.33    | 0.1457      | 108.5    | -3.6      | <0.0001      | 4         |
| 28 | GO:0042087        | cell-mediated immune response                       | 11       | 45  | 2.33     | 0.1457      | 108.5    | 3.49      | <0.0001      | 5         |
| 29 | GO:0042088        | T-helper 1 type immune response                     | 11       | 45  | 2.33     | 0.1457      | 108.5    | 3.49      | <0.0001      | 5         |
| 30 | BioCarta          | ALK in cardiac myocytes                             | 14       | 21  | -2.33    | 0.1457      | 108.5    | -3.48     | <0.0001      | 6         |
| 31 | GO:0005544        | calcium-dependent phospholipid binding              | 15       | 27  | -2.33    | 0.1457      | 108.5    | -3.32     | <0.0001      | 10        |
| 32 | GO:0016066        | cellular defense response (sensu Vertebrata)        | 12       | 42  | 2.33     | 0.1457      | 108.5    | 3.13      | <0.0001      | 14        |
| 33 | humanpaths        | Extracellular Matrix / Adhesion Molecules           | 52       | 19  | -3.83    | <0.0001     | 12       | -2.13     | 0.2141       | 112       |
| 34 | GO:0001501        | skeletal development                                | 47       | 26  | -2.33    | 0.1457      | 108.5    | -3.04     | <0.0001      | 18        |

|    |            |                                                            |    |    |       |         |       |       |         |       |
|----|------------|------------------------------------------------------------|----|----|-------|---------|-------|-------|---------|-------|
| 35 | KEGG:05060 | <b>Prion disease</b>                                       | 13 | 23 | -2.27 | 0.1413  | 142   | -3.04 | <0.0001 | 19    |
| 36 | GO:0006631 | <b>fatty acid metabolism</b>                               | 80 | 51 | 3.47  | <0.0001 | 16    | 2.05  | 0.303   | 146.5 |
| 37 | KEGG:00400 | <b>Phenylalanine, tyrosine and tryptophan biosynthesis</b> | 10 | 90 | 3.47  | <0.0001 | 15    | 1.88  | 0.3678  | 182   |
| 38 | BioCarta   | <b>CARM1 and Regulation of the Estrogen Receptor</b>       | 15 | 20 | -1.75 | 0.3009  | 252   | -3.18 | <0.0001 | 11    |
| 39 | GO:0051248 | <b>negative regulation of protein metabolism</b>           | 32 | 50 | 1.64  | 0.3024  | 312.5 | 3.36  | <0.0001 | 9     |
| 40 | GO:0006817 | <b>phosphate transport</b>                                 | 30 | 33 | -3.79 | <0.0001 | 13    | -1.41 | 0.5619  | 325   |
| 41 | GO:0000077 | <b>DNA damage checkpoint</b>                               | 11 | 36 | -1.34 | 0.4145  | 425.5 | -3.03 | <0.0001 | 21    |
| 42 | KEGG:03010 | <b>Ribosome</b>                                            | 33 | 21 | -3.45 | <0.0001 | 17    | -0.88 | 0.7405  | 607.5 |
| 43 | GO:0005764 | <b>Lysosome</b>                                            | 68 | 57 | 3.42  | <0.0001 | 18    | 0.71  | 0.7808  | 723.5 |
| 44 | GO:0000323 | <b>lytic vacuole</b>                                       | 68 | 57 | 3.42  | <0.0001 | 18    | 0.71  | 0.7808  | 723.5 |
| 45 | GO:0005773 | <b>Vacuole</b>                                             | 82 | 57 | 3.35  | <0.0001 | 20    | 0.71  | 0.7808  | 723.5 |
