# Supplementary material
Source: PubMed Central journal article supplement (PMC2265457)
Supplement: blood_blood-2007-10-119099_2.pdf [file blood_blood-2007-10-119099_2.pdf]

|    | Gene Set Category | Pathway                                             | Set Size | Percent Up | Ntk Stat | Ntk q-value | Ntk Rank | NEK* Stat | NEK* q-value | NEK* Rank |
|----|-------------------|-----------------------------------------------------|----------|------------|----------|-------------|----------|-----------|--------------|-----------|
| 1  | KEGG:00330        | Arginine and proline metabolism                     | 38       | 68         | 3.49     | <0.0001     | 11       | 4.07      | <0.0001      | 2         |
| 2  | GO:0016066        | cellular defense response (sensu Vertebrata)        | 12       | 75         | 3.6      | <0.0001     | 10       | 3.99      | <0.0001      | 6         |
| 3  | KEGG:04512        | ECM-receptor interaction                            | 47       | 19         | -4.3     | <0.0001     | 3        | -3.38     | <0.0001      | 16        |
| 4  | GO:0042087        | cell-mediated immune response                       | 11       | 73         | 3.33     | <0.0001     | 16       | 4.03      | <0.0001      | 3         |
| 5  | GO:0042088        | T-helper 1 type immune response                     | 11       | 73         | 3.33     | <0.0001     | 16       | 4.03      | <0.0001      | 3         |
| 6  | BioCyc            | fatty acid oxidation pathway                        | 14       | 71         | 3.31     | <0.0001     | 17       | 3.51      | <0.0001      | 10        |
| 7  | GO:0005604        | basement membrane                                   | 23       | 4          | -4.81    | <0.0001     | 2        | -3.1      | <0.0001      | 28        |
| 8  | KEGG:04510        | Focal adhesion                                      | 135      | 38         | -3.71    | <0.0001     | 7        | -3.13     | <0.0001      | 25        |
| 9  | GO:0016126        | sterol biosynthesis                                 | 22       | 23         | -2.99    | <0.0001     | 30       | -3.65     | <0.0001      | 8         |
| 10 | GO:0001817        | regulation of cytokine production                   | 16       | 75         | 3.25     | <0.0001     | 20       | 3.12      | <0.0001      | 26        |
| 11 | GO:0019888        | protein phosphatase regulator activity              | 32       | 22         | -2.94    | <0.0001     | 36       | -3.47     | <0.0001      | 12        |
| 12 | GO:0050954        | sensory perception of mechanical stimulus           | 39       | 38         | -2.78    | <0.0001     | 48       | -4.02     | <0.0001      | 4         |
| 13 | GO:0007605        | sensory perception of sound                         | 39       | 38         | -2.78    | <0.0001     | 48       | -4.02     | <0.0001      | 4         |
| 14 | GO:0019208        | phosphatase regulator activity                      | 33       | 24         | -2.66    | <0.0001     | 54       | -3.52     | <0.0001      | 9         |
| 15 | GO:0001816        | cytokine production                                 | 17       | 76         | 3.3      | <0.0001     | 18       | 2.88      | <0.0001      | 48        |
| 16 | GO:0042089        | cytokine biosynthesis                               | 17       | 76         | 3.3      | <0.0001     | 18       | 2.88      | <0.0001      | 48        |
| 17 | GO:0042995        | cell projection                                     | 36       | 19         | -2.8     | <0.0001     | 47       | -3.26     | <0.0001      | 19        |
| 18 | GO:0042157        | lipoprotein metabolism                              | 25       | 68         | 2.44     | <0.0001     | 68       | 4         | <0.0001      | 5         |
| 19 | GO:0016836        | hydro-lyase activity                                | 29       | 76         | 3.95     | <0.0001     | 6        | 2.5       | <0.0001      | 77        |
| 20 | KEGG:04662        | B cell receptor signaling pathway                   | 45       | 73         | 3.63     | <0.0001     | 9        | 2.46      | <0.0001      | 80        |
| 21 | GO:0005201        | extracellular matrix structural constituent         | 40       | 23         | -4.15    | <0.0001     | 4        | -2.37     | <0.0001      | 93        |
| 22 | GO:0007588        | Excretion                                           | 16       | 69         | 2.33     | 0.1711      | 96       | 3.77      | <0.0001      | 7         |
| 23 | GO:0042158        | lipoprotein biosynthesis                            | 16       | 75         | 2.33     | 0.1711      | 96       | 3.45      | <0.0001      | 14        |
| 24 | GO:0006497        | protein amino acid lipidation                       | 16       | 75         | 2.33     | 0.1711      | 96       | 3.45      | <0.0001      | 14        |
| 25 | GO:0007409        | Axonogenesis                                        | 18       | 61         | 2.33     | 0.1711      | 96       | 3.38      | <0.0001      | 15        |
| 26 | GO:0050900        | immune cell migration                               | 10       | 60         | 2.33     | 0.1711      | 96       | 3.33      | <0.0001      | 17        |
| 27 | GO:0030595        | immune cell chemotaxis                              | 10       | 60         | 2.33     | 0.1711      | 96       | 3.33      | <0.0001      | 17        |
| 28 | GO:0048468        | cell development                                    | 34       | 59         | 2.33     | 0.1711      | 96       | 3.26      | <0.0001      | 18        |
| 29 | GO:0006631        | fatty acid metabolism                               | 80       | 60         | 4.09     | <0.0001     | 5        | 2.33      | 0.1257       | 124       |
| 30 | GO:0005605        | basal lamina                                        | 14       | 0          | -3.41    | <0.0001     | 12       | -2.33     | 0.1257       | 124       |
| 31 | GO:0005578        | extracellular matrix (sensu Metazoa)                | 102      | 22         | -5.07    | <0.0001     | 1        | -2.05     | 0.1963       | 179.5     |
| 32 | GO:0031012        | extracellular matrix                                | 102      | 22         | -5.07    | <0.0001     | 1        | -2.05     | 0.1963       | 179.5     |
| 33 | GO:0043062        | extracellular structure organization and biogenesis | 11       | 18         | -3.28    | <0.0001     | 19       | -2.2      | 0.1175       | 162       |
| 34 | GO:0030198        | extracellular matrix organization and biogenesis    | 11       | 18         | -3.28    | <0.0001     | 19       | -2.2      | 0.1175       | 162       |
| 35 | GO:0006695        | cholesterol biosynthesis                            | 15       | 33         | -1.88    | 0.3431      | 170      | -3.49     | <0.0001      | 11        |
| 36 | GO:0051247        | positive regulation of                              | 21       | 81         | 1.88     | 0.3076      | 188      | 3.47      | <0.0001      | 13        |

|    |            |                                                                                              |    |    |       |         |     |       |         |       |
|----|------------|----------------------------------------------------------------------------------------------|----|----|-------|---------|-----|-------|---------|-------|
|    |            | <b>protein metabolism</b>                                                                    |    |    |       |         |     |       |         |       |
| 37 | BioCarta   | <b>Keratinocyte Differentiation</b>                                                          | 17 | 29 | -1.64 | 0.4202  | 239 | -4.22 | <0.0001 | 1     |
| 38 | GO:0006730 | <b>one-carbon compound metabolism</b>                                                        | 24 | 63 | 3.36  | <0.0001 | 15  | 1.88  | 0.2279  | 239.5 |
| 39 | GO:0001503 | <b>Ossification</b>                                                                          | 10 | 50 | 3.64  | <0.0001 | 8   | 1.55  | 0.3217  | 351   |
| 40 | GO:0031214 | <b>biomineral formation</b>                                                                  | 10 | 50 | 3.64  | <0.0001 | 8   | 1.55  | 0.3217  | 351   |
| 41 | GO:0042098 | <b>T cell proliferation</b>                                                                  | 10 | 50 | 1.34  | 0.4614  | 387 | 3.18  | <0.0001 | 21    |
| 42 | GO:0006092 | <b>main pathways of carbohydrate metabolism</b>                                              | 75 | 65 | 3.4   | <0.0001 | 13  | 1.34  | 0.4057  | 412   |
| 43 | GO:0016616 | <b>oxidoreductase activity, acting on the CH-OH group of donors, NAD or NADP as acceptor</b> | 57 | 68 | 3.38  | <0.0001 | 14  | 1.13  | 0.4582  | 532   |
| 44 | KEGG:00632 | <b>Benzoate degradation via CoA ligation</b>                                                 | 32 | 41 | -0.88 | 0.5939  | 664 | -3.24 | <0.0001 | 20    |
