# Supplementary material
Source: PubMed Central journal article supplement (PMC2265457)
Supplement: blood_blood-2007-10-119099_3.pdf [file blood_blood-2007-10-119099_3.pdf]

|    | Gene Set Category | Pathway                                                               | Set Size | %Up | Ntk Stat | Ntk q-value | Ntk Rank | NEK* Stat | NEK* q-value | NEK* Rank |
|----|-------------------|-----------------------------------------------------------------------|----------|-----|----------|-------------|----------|-----------|--------------|-----------|
| 1  | GO:0004857        | enzyme inhibitor activity                                             | 128      | 30  | -4.25    | <0.0001     | 14       | -3.9      | <0.0001      | 2         |
| 2  | KEGG:01430        | Cell Communication                                                    | 53       | 28  | -5.59    | <0.0001     | 5        | -3.04     | <0.0001      | 15        |
| 3  | KEGG:04510        | Focal adhesion                                                        | 135      | 33  | -5.46    | <0.0001     | 7        | -2.96     | <0.0001      | 19        |
| 4  | KEGG:04512        | ECM-receptor interaction                                              | 47       | 21  | -5.95    | <0.0001     | 3        | -2.8      | <0.0001      | 27        |
| 5  | GO:0031497        | chromatin assembly                                                    | 54       | 20  | -4.28    | <0.0001     | 13       | -2.97     | <0.0001      | 18        |
| 6  | KEGG:04210        | Apoptosis                                                             | 51       | 29  | -4.24    | <0.0001     | 15       | -2.99     | <0.0001      | 16        |
| 7  | GO:0000785        | chromatin                                                             | 94       | 32  | -4.34    | <0.0001     | 12       | -2.96     | <0.0001      | 21        |
| 8  | GO:0005604        | basement membrane                                                     | 23       | 17  | -5.08    | <0.0001     | 8        | -2.81     | <0.0001      | 26        |
| 9  | GO:0006695        | cholesterol biosynthesis                                              | 15       | 27  | -3.52    | <0.0001     | 32       | -3.39     | <0.0001      | 8         |
| 10 | GO:0007059        | chromosome segregation                                                | 25       | 12  | -5.53    | <0.0001     | 6        | -2.7      | <0.0001      | 38        |
| 11 | GO:0043161        | proteasomal ubiquitin-dependent protein catabolism                    | 11       | 9   | -3.36    | <0.0001     | 38       | -3.22     | <0.0001      | 9         |
| 12 | GO:0001501        | skeletal development                                                  | 47       | 23  | -4.19    | <0.0001     | 16       | -2.73     | <0.0001      | 32        |
| 13 | GO:0006334        | nucleosome assembly                                                   | 52       | 19  | -4.14    | <0.0001     | 17       | -2.65     | <0.0001      | 40        |
| 14 | BioCarta          | Ceramide Signaling Pathway                                            | 14       | 21  | -3.17    | <0.0001     | 49       | -3.06     | <0.0001      | 13        |
| 15 | GO:0043062        | extracellular structure organization and biogenesis                   | 11       | 9   | -4.92    | <0.0001     | 9        | -2.37     | <0.0001      | 56        |
| 16 | GO:0030198        | extracellular matrix organization and biogenesis                      | 11       | 9   | -4.92    | <0.0001     | 9        | -2.37     | <0.0001      | 56        |
| 17 | BioCarta          | Caspase Cascade in Apoptosis                                          | 17       | 29  | -3       | <0.0001     | 63       | -3.17     | <0.0001      | 11        |
| 18 | GO:0016126        | sterol biosynthesis                                                   | 22       | 32  | -2.93    | <0.0001     | 73       | -3.18     | <0.0001      | 10        |
| 19 | KEGG:00220        | Urea cycle and metabolism of amino groups                             | 18       | 56  | 2.93     | <0.0001     | 72       | 2.96      | <0.0001      | 20        |
| 20 | GO:0005201        | extracellular matrix structural constituent                           | 40       | 23  | -7.39    | <0.0001     | 1        | -2.15     | 0.1692       | 116       |
| 21 | GO:0005694        | chromosome                                                            | 190      | 35  | -4.82    | <0.0001     | 10       | -2.31     | 0.1772       | 110       |
| 22 | GO:0005581        | collagen                                                              | 15       | 13  | -5.6     | <0.0001     | 4        | -2.05     | 0.2632       | 137       |
| 23 | GO:0016810        | hydrolase activity, acting on carbon-nitrogen (but not peptide) bonds | 38       | 61  | 2.33     | 0.1049      | 138.5    | 3.5       | <0.0001      | 5         |
| 24 | GO:0000786        | nucleosome                                                            | 39       | 18  | -3.72    | <0.0001     | 21       | -2.05     | 0.2632       | 137       |
| 25 | GO:0009064        | glutamine family amino acid metabolism                                | 23       | 65  | 2.33     | 0.1049      | 138.5    | 2.95      | <0.0001      | 22        |
| 26 | GO:0005605        | basal lamina                                                          | 14       | 14  | -3.82    | <0.0001     | 19       | -2.01     | 0.2381       | 166       |
| 27 | GO:0006928        | cell motility                                                         | 130      | 38  | -3.86    | <0.0001     | 18       | -1.88     | 0.3154       | 176       |
| 28 | GO:0040011        | locomotion                                                            | 130      | 38  | -3.86    | <0.0001     | 18       | -1.88     | 0.3154       | 176       |
| 29 | GO:0051674        | localization of cell                                                  | 130      | 38  | -3.86    | <0.0001     | 18       | -1.88     | 0.3154       | 176       |
| 30 | GO:0005578        | extracellular matrix (sensu Metazoa)                                  | 102      | 24  | -6.69    | <0.0001     | 2        | -1.75     | 0.3488       | 212.5     |
| 31 | GO:0031012        | extracellular matrix                                                  | 102      | 24  | -6.69    | <0.0001     | 2        | -1.75     | 0.3488       | 212.5     |
| 32 | GO:0043065        | positive regulation of apoptosis                                      | 110      | 55  | 2.05     | 0.1634      | 217.5    | 3.06      | <0.0001      | 14        |
| 33 | GO:0043068        | positive regulation of programmed cell death                          | 110      | 55  | 2.05     | 0.1634      | 217.5    | 3.06      | <0.0001      | 14        |
| 34 | GO:0006917        | induction of apoptosis                                                | 99       | 54  | 1.88     | 0.2         | 264      | 2.99      | <0.0001      | 17        |
| 35 | GO:0012502        | induction of programmed cell death                                    | 99       | 54  | 1.88     | 0.2         | 264      | 2.99      | <0.0001      | 17        |

|    |            |                                                   |    |    |       |         |       |       |         |       |
|----|------------|---------------------------------------------------|----|----|-------|---------|-------|-------|---------|-------|
| 36 | GO:0019079 | <b>viral genome replication</b>                   | 17 | 18 | -1.55 | 0.3123  | 350   | -3.95 | <0.0001 | 1     |
| 37 | GO:0007507 | <b>heart development</b>                          | 16 | 75 | 1.55  | 0.2995  | 363   | 3.61  | <0.0001 | 4     |
| 38 | GO:0019058 | <b>viral infectious cycle</b>                     | 24 | 25 | -1.48 | 0.3229  | 394.5 | -3.46 | <0.0001 | 6     |
| 39 | KEGG:00600 | <b>Glycosphingolipid metabolism</b>               | 22 | 68 | 1.41  | 0.361   | 405.5 | 3.69  | <0.0001 | 3     |
| 40 | BioCarta   | <b>Segmentation Clock</b>                         | 10 | 30 | -1.41 | 0.3416  | 420.5 | -2.93 | <0.0001 | 23    |
| 41 | KEGG:04060 | <b>Cytokine-cytokine receptor interaction</b>     | 79 | 33 | -3.76 | <0.0001 | 20    | -1.23 | 0.5     | 426   |
| 42 | GO:0006817 | <b>phosphate transport</b>                        | 30 | 33 | -4.55 | <0.0001 | 11    | -1.17 | 0.5212  | 446.5 |
| 43 | GO:0051248 | <b>negative regulation of protein metabolism</b>  | 32 | 53 | 1.13  | 0.3968  | 583.5 | 3.44  | <0.0001 | 7     |
| 44 | GO:0004879 | <b>ligand-dependent nuclear receptor activity</b> | 20 | 50 | 0.31  | 0.6253  | 1103  | 3.12  | <0.0001 | 12    |
